# Supplementary material for: Sex-specific differences in fetal and infant growth patterns: a prospective population-based cohort study
Source: PubMed Central journal article supplement (PMC5135770; doi:10.1186/s13293-016-0119-1), 2016-12-03
Supplement: 13293_2016_119_MOESM1_ESM.pdf [file 13293_2016_119_MOESM1_ESM.pdf]

**Supplemental Figure 1      Associations between fetal sex and weight– repeated measurements analyses**

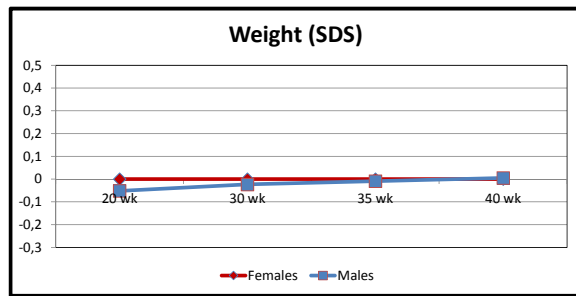

$P = 0,10$

Results from unbalanced repeated measurement regression analyses. Data are represented as SD scores. For this analyses the Usher and McLean standard was used.
